# Supplementary material
Source: ML conference proceedings conference paper supplement (https://aclanthology.org/2025.lm4dh-1.2)
Supplement: OptionalSupplementaryMaterial [file Crédito y planificación.docx]

**Crédito**

- Claude: 2.5 USD
- OpenAI: 7.41 USD
- DeepSeek: 4.51 USD
- Phi
- Qwen

**Fases:**

1. Proof-of-concept: generar 10 historias, variarlas, y calcular los embbedings.
2. Ejecución a escala.
3. Redacción.
